# Supplementary material for: Improving the Thermostability of Serine Protease PB92 from Bacillus alcalophilus via Site-Directed Mutagenesis Based on Semi-Rational Design
Source: MDPI journal article supplement (doi:10.3390/foods12163081), 2023-08-16
Supplement: s1 [file s1]

## Supporting Information

# Improving the Thermostability of Serine Protease PB92 from *Bacillus alcalophilus* via Site-Directed Mutagenesis Based on Semi-Rational Design

Huabiao Miao <sup>1,2</sup>, Xia Xiang <sup>2</sup>, Nanyu Han <sup>1,2</sup>, Qian Wu <sup>1,2</sup> and Zunxi Huang <sup>1,2,\*</sup>

<sup>1</sup>. Engineering Research Center of Sustainable Development and Utilization of Biomass Energy, Ministry of Education, Kunming 650500, China

<sup>2</sup>. School of Life Science, Yunnan Normal University, Kunming 650500, China

\* Correspondence: huangzunxi@ynnu.edu.cn; Tel.: +86-0871-5920830; Fax: +86-0871-5920952

**The transparent circle formed for different mutants.** CK represents the control group, the strain with an empty expression vector. WT represents the wild type group, the strain with an expression vector of protease PB92. Others represents the mutant group, the strain with different mutant plasmids of protease PB92. All single colonies are inoculated overnight on plates containing 50 mg/mL kanamycin and 1% skim milk powder at 37°C.

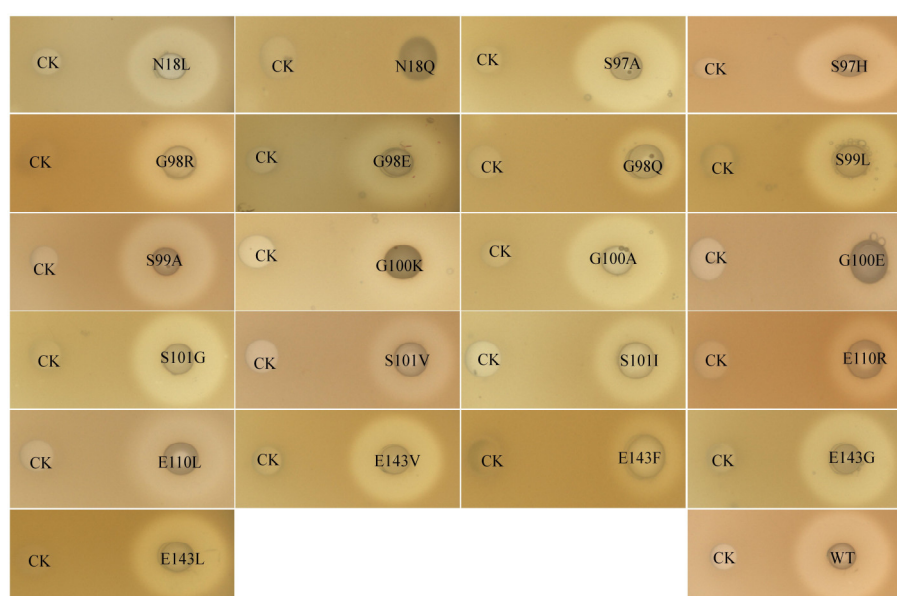

**Figure S1.** The transparent circle formed for different mutants.

**Comparison of enzyme activity of different mutants.** (a) Wild type, and mutants of N18 and S97. (b) Mutants of G98 and S99. (c) Mutants of G100 and S101. (d) Mutants of E110 and R143. WT represents the wild type group, which has an expression vector for the protease PB92, indicated by a red column. Others represents the mutant group, the strain with different mutant plasmids of protease PB92, indicated by a black column. The enzyme activity demonstrated high activity at pH 10.5 and 55°C. The enzyme activity of wild-type protease PB92 was  $3548.05 \pm 80.39$  U/mL, which was defined as 100%. Relative activity was defined as the percentage of measured high enzyme activity. All values are presented as the mean  $\pm$  SD of triplicate experiments.

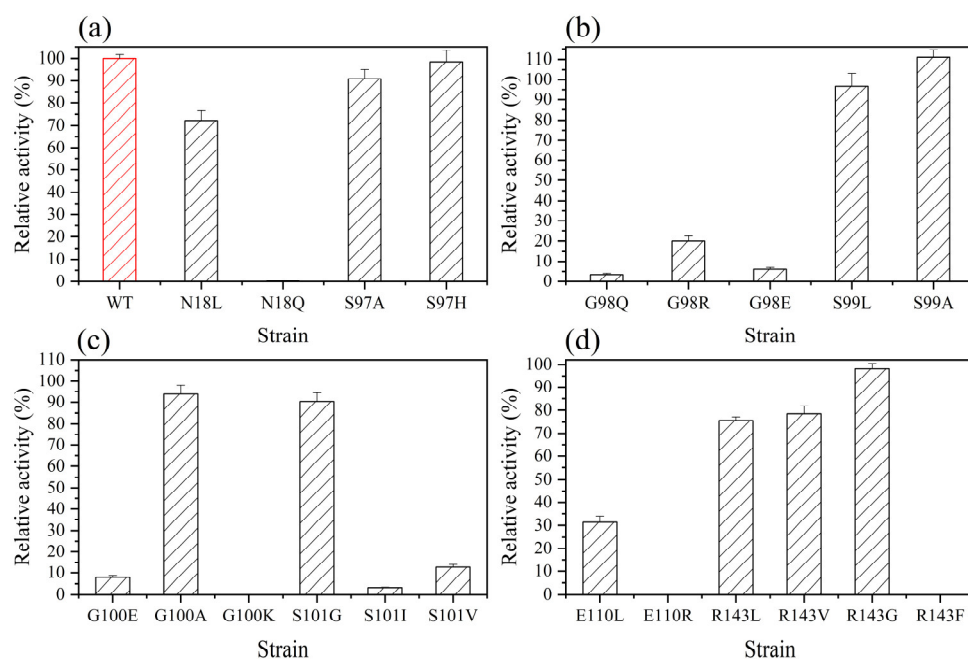

**Figure S2.** Comparison of enzyme activity of different mutants.

**The optimal temperature for different mutants of protease PB92.** (a) Wild type, and mutants N18L, S99A, and S99L. (b) Mutants S97H, S97A, G98E, and G98R. (c) Mutants G100E, G100A, S101G, and S101V. (d) Mutants E110L, R143V, R143L, and R143G. WT represents the wild type group, which has an expression vector for the protease PB92. Others represents the mutant group, the strain with different mutant plasmids of protease PB92. The enzyme activity was determined at different temperatures of 40-75°C and pH 10.5. The enzyme activity demonstrated high activity, which was defined as 100%. Relative activity was defined as the percentage of measured high enzyme activity. All values are presented as the mean  $\pm$  SD of triplicate experiments.

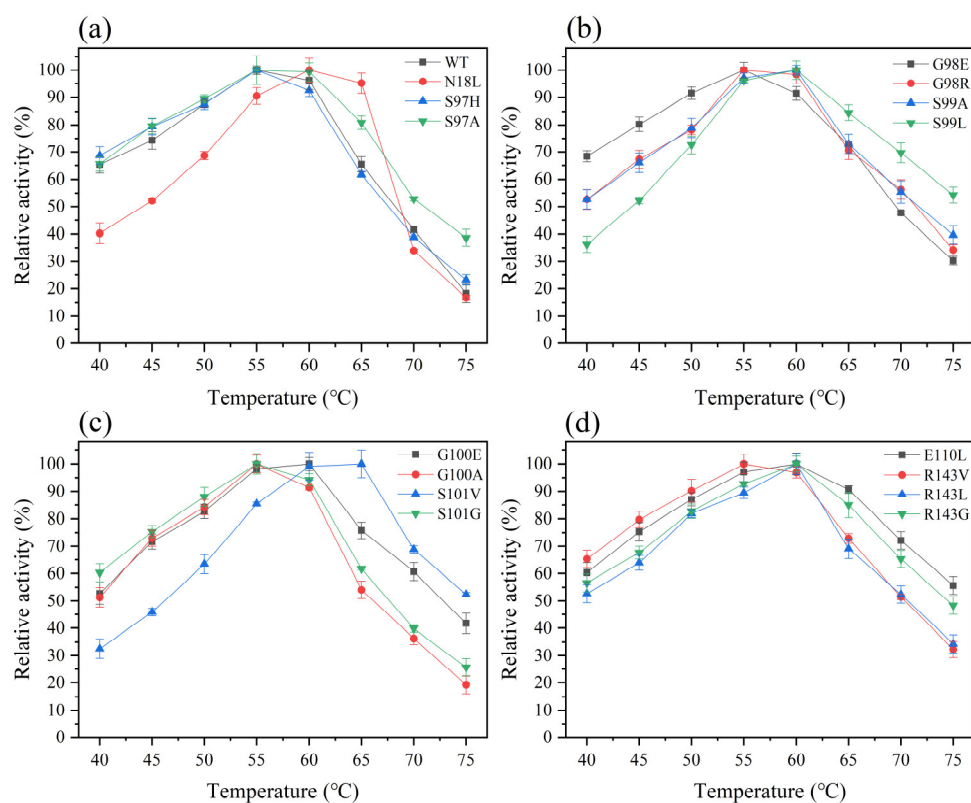

**Figure S3.** The optimal temperature for different mutants of protease PB92.

**Overall hydrophobicity of the protein.** Overall hydrophobicity of protein and interaction between mutant amino acids with other residues determined using the software Discovery Studio Visualizer.

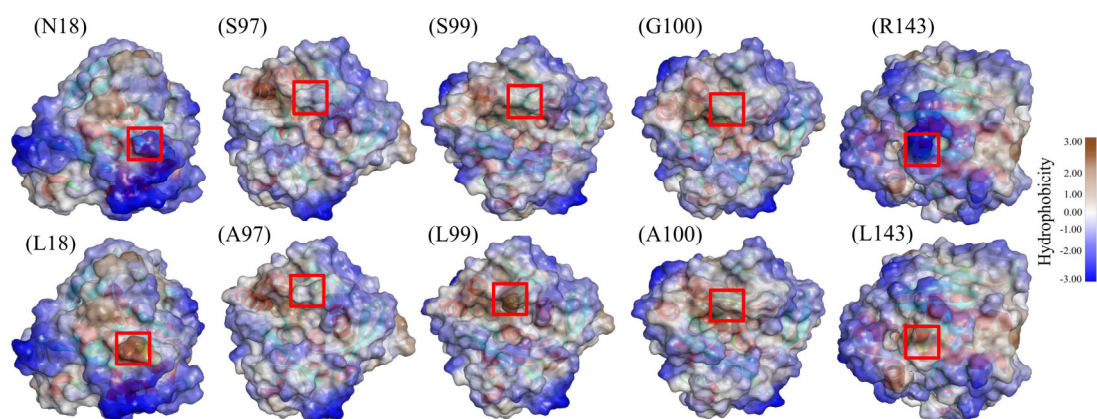

**Figure S4.** Overall hydrophobicity of the protein.

**The solvent-accessible surface area of mutant G98R.** (a) Gly98. (b) Arg98. (c) Comparison of solvent-accessible surface area. The solvent-accessible surface area of mutant G98R was calculated using gmx hbond, and the sasa\_dots and structure visualization were presented using PyMOL.

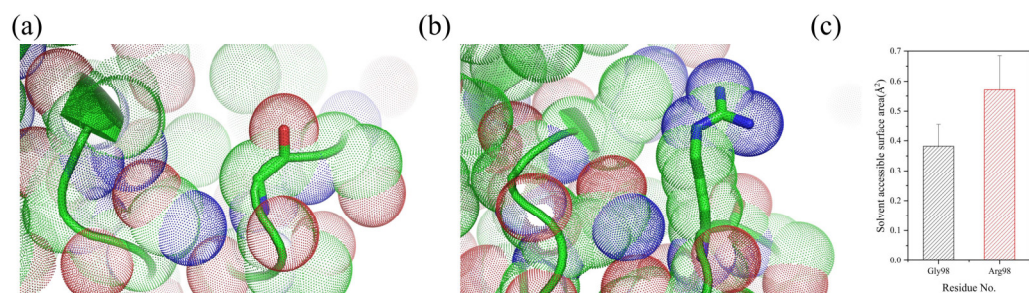

**Figure S5.** The solvent-accessible surface area of mutant G98R.

**Table S1.** The frequencies of 20 different amino acids were counted that the 8 amino acid sites corresponding to protease PB92 via multi-sequence alignment.

|      |       |       |       |       |       |       |       |       | % |
|------|-------|-------|-------|-------|-------|-------|-------|-------|---|
| Item | N18   | S97   | G98   | S99   | G100  | S101  | E110  | R143  |   |
| D    | 7.83  | 6.59  | 6.98  | 2.06  | 8.25  | 3.88  | 5.00  | 5.56  |   |
| K    | 4.35  | 4.40  | 5.81  | 6.19  | 11.34 | 6.80  | 6.25  | 5.56  |   |
| H    | 1.74  | 9.89  | 1.16  | 1.03  | 3.09  | 3.88  | 2.50  | 1.85  |   |
| L    | 13.04 | 7.69  | 5.81  | 16.49 | 5.15  | 3.88  | 21.25 | 9.26  |   |
| E    | 5.22  | 3.30  | 12.79 | 5.15  | 13.40 | 1.94  | 0.00  | 4.63  |   |
| Y    | 4.35  | 7.69  | 3.49  | 4.12  | 4.12  | 0.00  | 3.75  | 4.63  |   |
| A    | 6.96  | 16.48 | 5.81  | 12.37 | 14.43 | 7.77  | 5.00  | 6.48  |   |
| S    | 4.35  | 0.00  | 8.14  | 0.00  | 2.06  | 0.00  | 3.75  | 2.78  |   |
| I    | 6.09  | 5.49  | 1.16  | 8.25  | 6.19  | 12.62 | 6.25  | 6.48  |   |
| Q    | 8.70  | 1.10  | 10.47 | 2.06  | 1.03  | 6.80  | 3.75  | 6.48  |   |
| C    | 0.87  | 2.20  | 1.16  | 0.00  | 0.00  | 0.97  | 0.00  | 0.00  |   |
| F    | 4.35  | 3.30  | 3.49  | 1.03  | 7.22  | 1.94  | 3.75  | 9.26  |   |
| W    | 5.22  | 2.20  | 0.00  | 0.00  | 2.06  | 0.97  | 0.00  | 1.85  |   |
| M    | 6.09  | 3.30  | 0.00  | 1.03  | 2.06  | 3.88  | 1.25  | 3.70  |   |
| R    | 6.09  | 3.30  | 13.95 | 7.22  | 5.15  | 3.88  | 12.50 | 0.00  |   |
| G    | 6.09  | 6.59  | 0.00  | 9.28  | 0.00  | 14.56 | 3.75  | 10.19 |   |
| V    | 4.35  | 5.49  | 2.33  | 7.22  | 4.12  | 12.62 | 6.25  | 9.26  |   |
| T    | 3.48  | 5.49  | 2.33  | 7.22  | 3.09  | 1.94  | 5.00  | 2.78  |   |

|       |      |      |      |      |      |      |      |      |
|-------|------|------|------|------|------|------|------|------|
| P     | 0.87 | 3.30 | 9.30 | 7.22 | 6.19 | 7.77 | 3.75 | 2.78 |
| N     | 0.00 | 2.20 | 5.81 | 2.06 | 1.03 | 3.88 | 6.25 | 6.48 |
| Total | 100  | 100  | 100  | 100  | 100  | 100  | 100  | 100  |

**Table S2.** Primers used in the present research.

| Primer  | Primer Sequence (5'-3')                           |
|---------|---------------------------------------------------|
| PB92-F  | TGCGGCGTCCATAAAGTGGGATCCATGAAGAAACCGTTGGGGAAAATTG |
| PB92-R  | GTGATGTCTAGACTGCAGGTCGACGCGTGTTGCCGCTTCTGCATTGACA |
| N18L-F  | AAGCCCCAGCTGCCCATT <b>T</b> ACGTGGATTGACA         |
| N18L-R  | <b>T</b> AAATGGGCAGCTGGGGCTTGCACACGGCTAA          |
| N18Q-F  | AAGCCCCAGCTGCCCAT <b>C</b> AACGTGGATTGACA         |
| N18Q-R  | <b>T</b> TGATGGGCAGCTGGGGCTTGCACACGGCTAA          |
| S97A-F  | TTAAAGTATTAGGGGCGG <b>C</b> CGGTTTCAGGTT          |
| S97A-R  | <b>G</b> GCCGCCCCTAATACTTTAACAGCGTATAGTT          |
| S97H-F  | TTAAAGTATTAGGGGCG <b>C</b> ACGGTTTCAGGTT          |
| S97H-R  | <b>G</b> TGCGCCCCTAATACTTTAACAGCGTATAGTT          |
| G98R-F  | AAGTATTAGGGGCGAGC <b>C</b> GTTTCAGGTTTCGGT        |
| G98R-R  | <b>A</b> CGGCTCGCCCCTAATACTTTAACAGCGTATA          |
| G98Q-F  | AAGTATTAGGGGCGAGC <b>A</b> GTCAGGTTTCGGT          |
| G98Q-R  | <b>C</b> TGGCTCGCCCCTAATACTTTAACAGCGTATA          |
| G98E-F  | AAGTATTAGGGGCGAGC <b>G</b> AATCAGGTTTCGGT         |
| G98E-R  | <b>T</b> TCGCTCGCCCCTAATACTTTAACAGCGTATA          |
| S99L-F  | TATTAGGGGCGAGCGGTT <b>T</b> AGGTTTCGGTCAGC        |
| S99L-R  | <b>T</b> AAACCGCTCGCCCCTAATACTTTAACAGCGTAT        |
| S99A-F  | TATTAGGGGCGAGCGGT <b>G</b> CAGGTTTCGGTCAGC        |
| S99A-R  | <b>T</b> GCACCGCTCGCCCCTAATACTTTAACAGCGTAT        |
| G100E-F | TAGGGGCGAGCGGTT <b>C</b> AGAATCGGTCAGCTCG         |
| G100E-R | <b>T</b> TCTGAACCGCTCGCCCCTAATACTTTAACAGCGT       |
| G100A-F | TAGGGGCGAGCGGTT <b>C</b> AGCTTCGGTCAGCTCG         |
| G100A-R | <b>A</b> GCTGAACCGCTCGCCCCTAATACTTTAACAGCGT       |

---

|         |                                                   |
|---------|---------------------------------------------------|
| G100K-F | <u>TAGGGGCGAGCGGTTCAA</u> <b>AAG</b> TCGGTCAGCTCG |
| G100K-R | <b>CTTT</b> GAAACCGCTCGCCCCTAATACTTTAACAGCGT      |
| S101G-F | GGGCGAGCGGTTCAGGT <b>GG</b> AGTCAGCTCGATT         |
| S101G-R | <b>TCC</b> ACCTGAACCGCTCGCCCCTAATACTTTAA          |
| S101I-F | GGGCGAGCGGTTCAGGT <b>TAT</b> AGTCAGCTCGATT        |
| S101I-R | <b>TAT</b> ACCTGAACCGCTCGCCCCTAATACTTTAA          |
| S101V-F | GGGCGAGCGGTTCAGGT <b>G</b> TAGTCAGCTCGATT         |
| S101V-R | <b>TAC</b> ACCTGAACCGCTCGCCCCTAATACTTTAA          |
| E110L-F | CGATTGCCCAAGGATT <b>GCT</b> ATGGGCAGGGAAC         |
| E110L-R | <b>TAG</b> CAATCCTTGGGCAATCGAGCTGACCGAAC          |
| E110R-F | CGATTGCCCAAGGATT <b>GCG</b> ATGGGCAGGGAAC         |
| E110R-R | <b>TCG</b> CAATCCTTGGGCAATCGAGCTGACCGAAC          |
| R143L-F | TTAATAGCGCGACTTCT <b>TTA</b> GGCGTTCTTGTT         |
| R143L-R | <b>TAA</b> AGAAGTCGCGCTATTAACAGCTTGCTC            |
| R143V-F | TTAATAGCGCGACTTCT <b>G</b> TAGGCGTTCTTGTT         |
| R143V-R | <b>TAC</b> AGAAGTCGCGCTATTAACAGCTTGCTC            |
| R143G-F | TTAATAGCGCGACTTCT <b>GG</b> AGGCGTTCTTGTT         |
| R143G-R | <b>TGG</b> AGAAGTCGCGCTATTAACAGCTTGCTC            |
| R143F-F | TTAATAGCGCGACTTCT <b>TT</b> CGGCGTTCTTGTT         |
| R143F-R | <b>GAA</b> AGAAGTCGCGCTATTAACAGCTTGCTC            |

---

The *Bam*HI and *Sal*I site sequences are underlined, and the mutation site is bolded.
